# Supplementary material for: Synthesis, crystal structure and magnetic properties of two oxalato-bridged dimetallic trinuclear complexes combined with a polar cation
Source: Royal Society of Chemistry journal article supplement (doi:10.1039/c002468f), 2010-01-01
Supplement: c002468f.pdf [file c002468f.pdf]

**Supporting Information** (SI) for the manuscript: Dalton C002468F

**Synthesis, crystal structure and magnetic properties of two oxalato-bridged  
dimetallic trinuclear complexes combined with a polar cation**

Emilio Pardo,<sup>a</sup> Cyrille Train,<sup>a,b</sup> Rodrigue Lescouëzec,<sup>a</sup> Kamal Boubekeur,<sup>a</sup> Eliseo  
Ruiz,<sup>c</sup> Francesc Lloret,<sup>d</sup> and Michel Verdaguer\*<sup>a</sup>

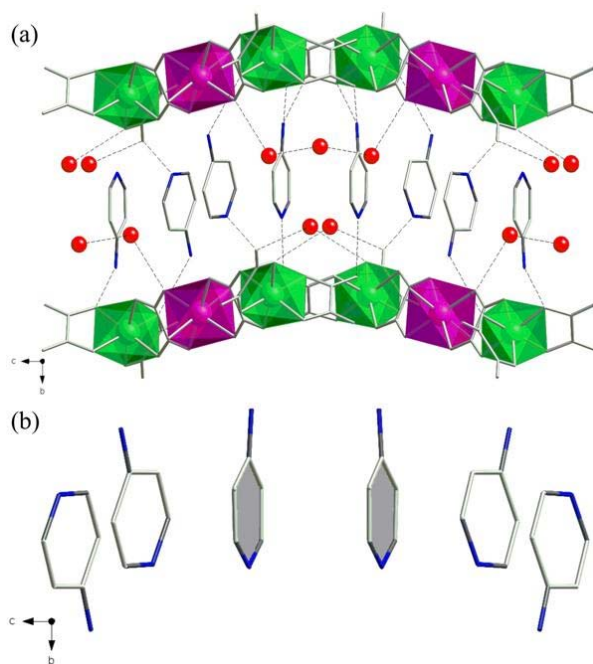

**Fig. S1.** (a) Crystal packing of **1** along the *bc* plane; (b) View of the assembly of aromatic cations of **1** showing the  $\pi$ - $\pi$  stacking (grey shade) between the pyridine rings of central neighbouring cations.

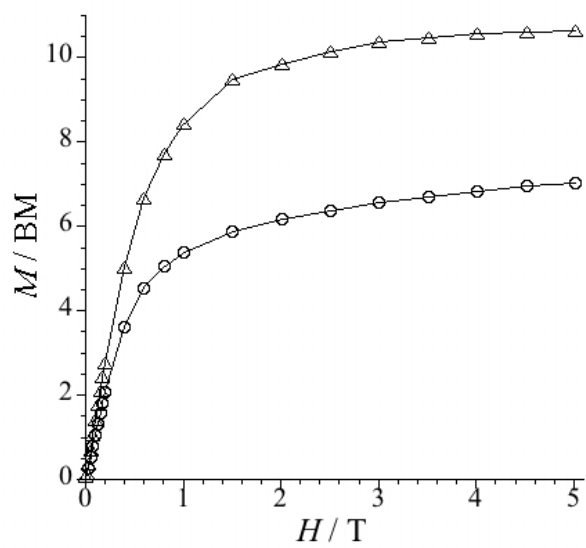

**Fig. S2.** Field dependence of  $M$  in Bohr magnetons (BM) of **1** ( $\Delta$ ) and **2** ( $\circ$ ) at 2.0 K. The solid lines are eye-guides.
